# Supplementary material for: Arctic Ocean Microbial Community Structure before and after the 2007 Record Sea Ice Minimum
Source: PubMed Central journal article supplement (PMC3212577; doi:10.1371/journal.pone.0027492), 2011-11-09
Supplement: pone.0027492.s001.pdf [file pone.0027492.s001.pdf]

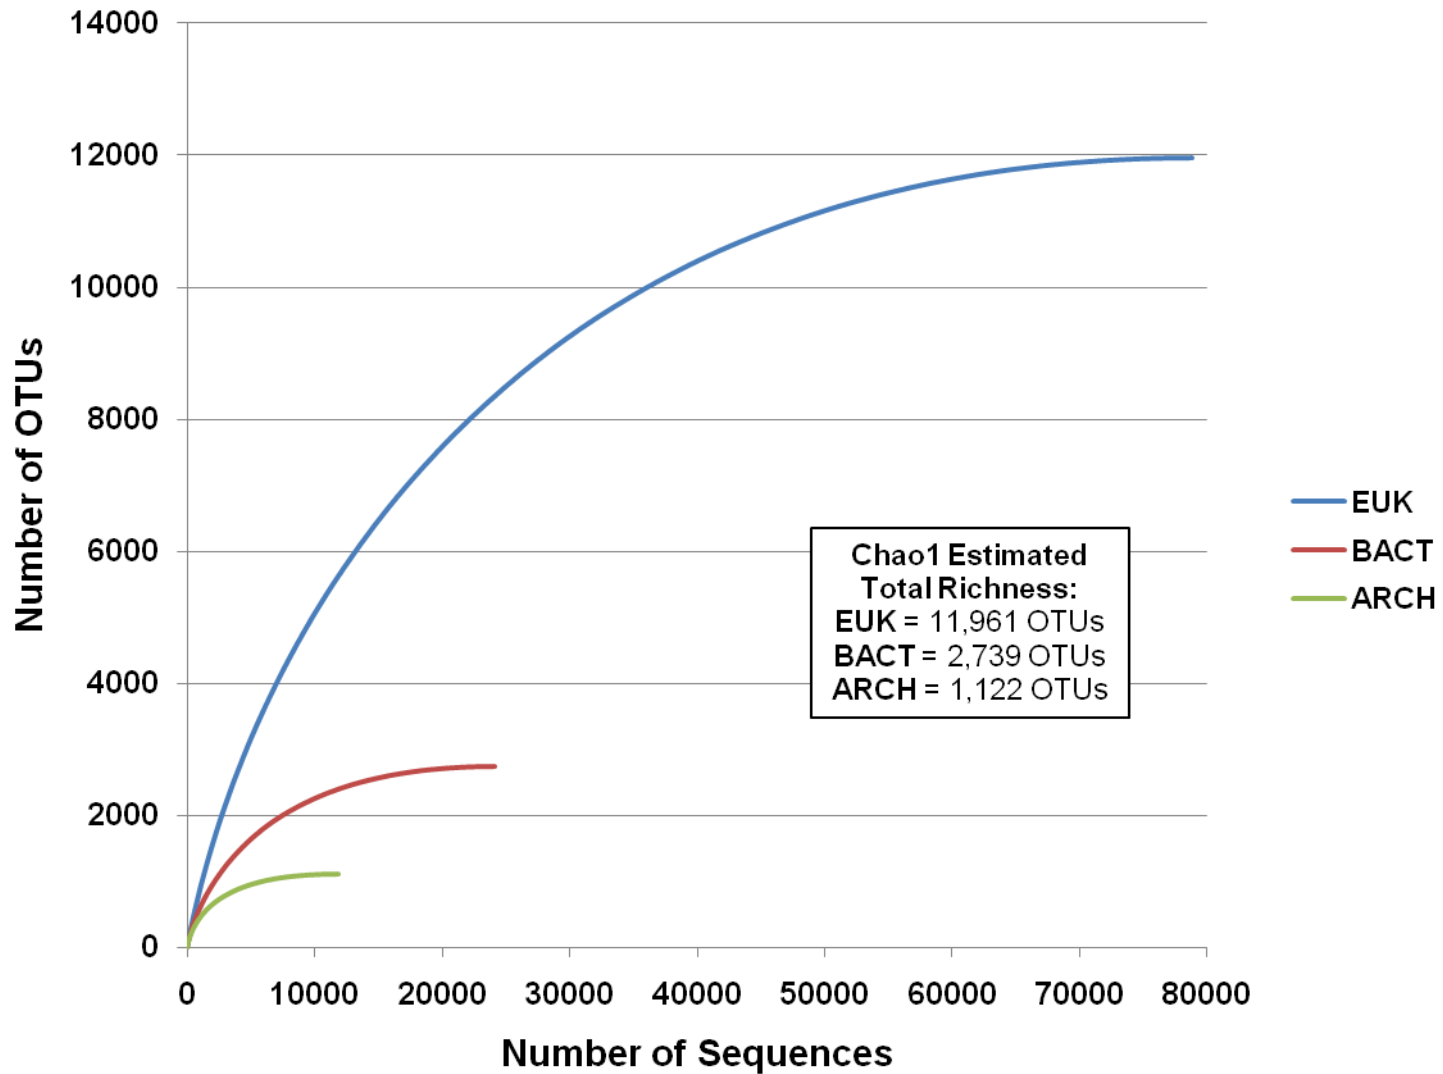

**Figure S1. Rarefaction analysis for Bacteria (97% OTU level), Eukaryotes (98% OTU level) and Archaea (97% OTU level).** The inset box shows the Chao1 total richness estimate for the three Domains.
