# Supplementary material for: Arctic Ocean Microbial Community Structure before and after the 2007 Record Sea Ice Minimum
Source: PubMed Central journal article supplement (PMC3212577; doi:10.1371/journal.pone.0027492), 2011-11-09
Supplement: pone.0027492.s002.pdf [file pone.0027492.s002.pdf]

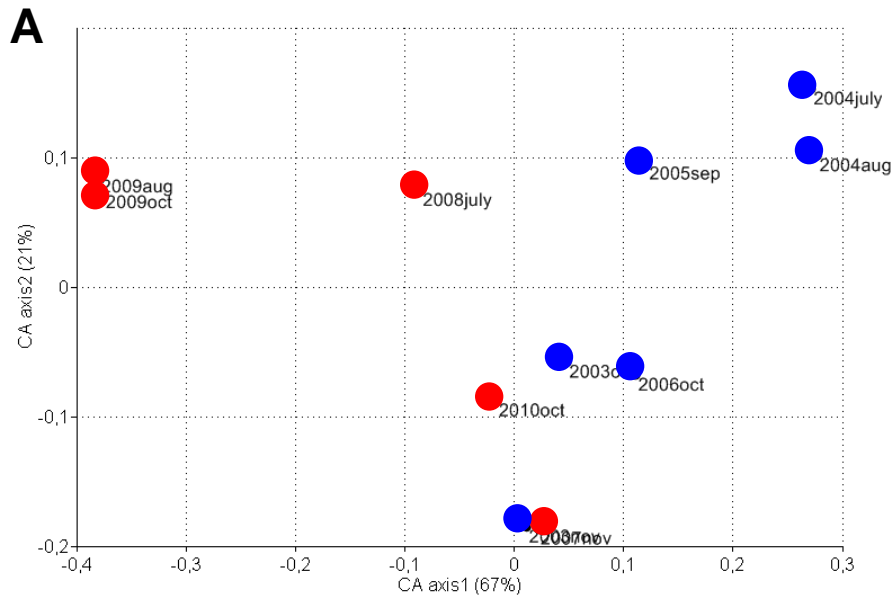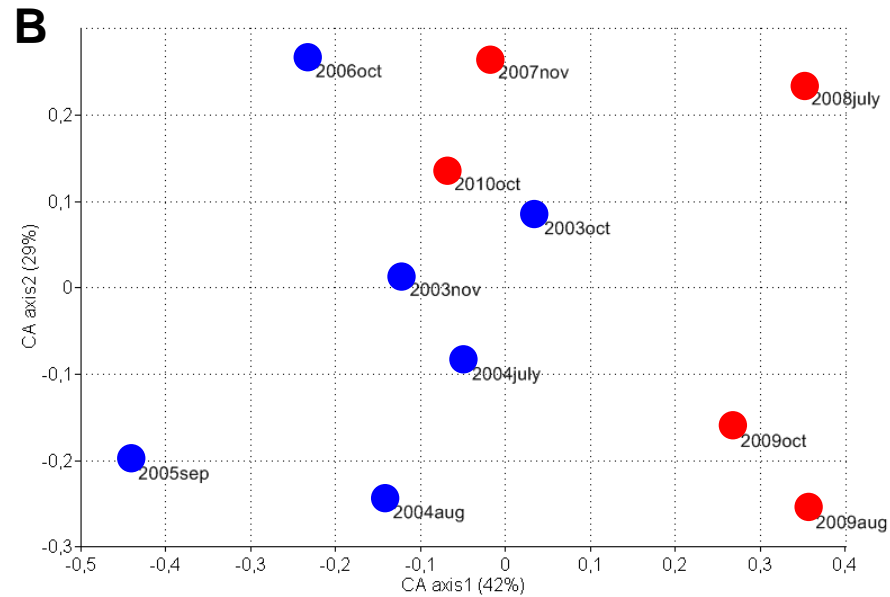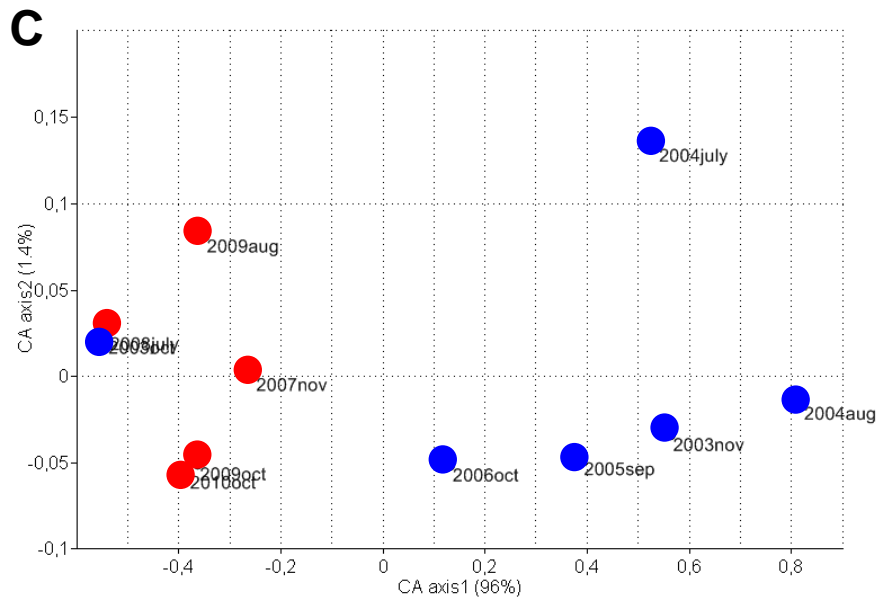

**Figure S2. Whole community diversity comparisons.** Correspondence analysis calculated from the percent taxonomic distributions of the total OTUs. Dots are colored according to Ice Extent: <2007 in blue and >2007 in red. **(A)** Bacteria 97% phylum-level OTUs. **(B)** Eukarya 98% major-group-level OTUs. **(C)** Archaea 97% genus-level OTUs.
