# Supplementary material for: Arctic Ocean Microbial Community Structure before and after the 2007 Record Sea Ice Minimum
Source: PubMed Central journal article supplement (PMC3212577; doi:10.1371/journal.pone.0027492), 2011-11-09
Supplement: pone.0027492.s003.pdf [file pone.0027492.s003.pdf]

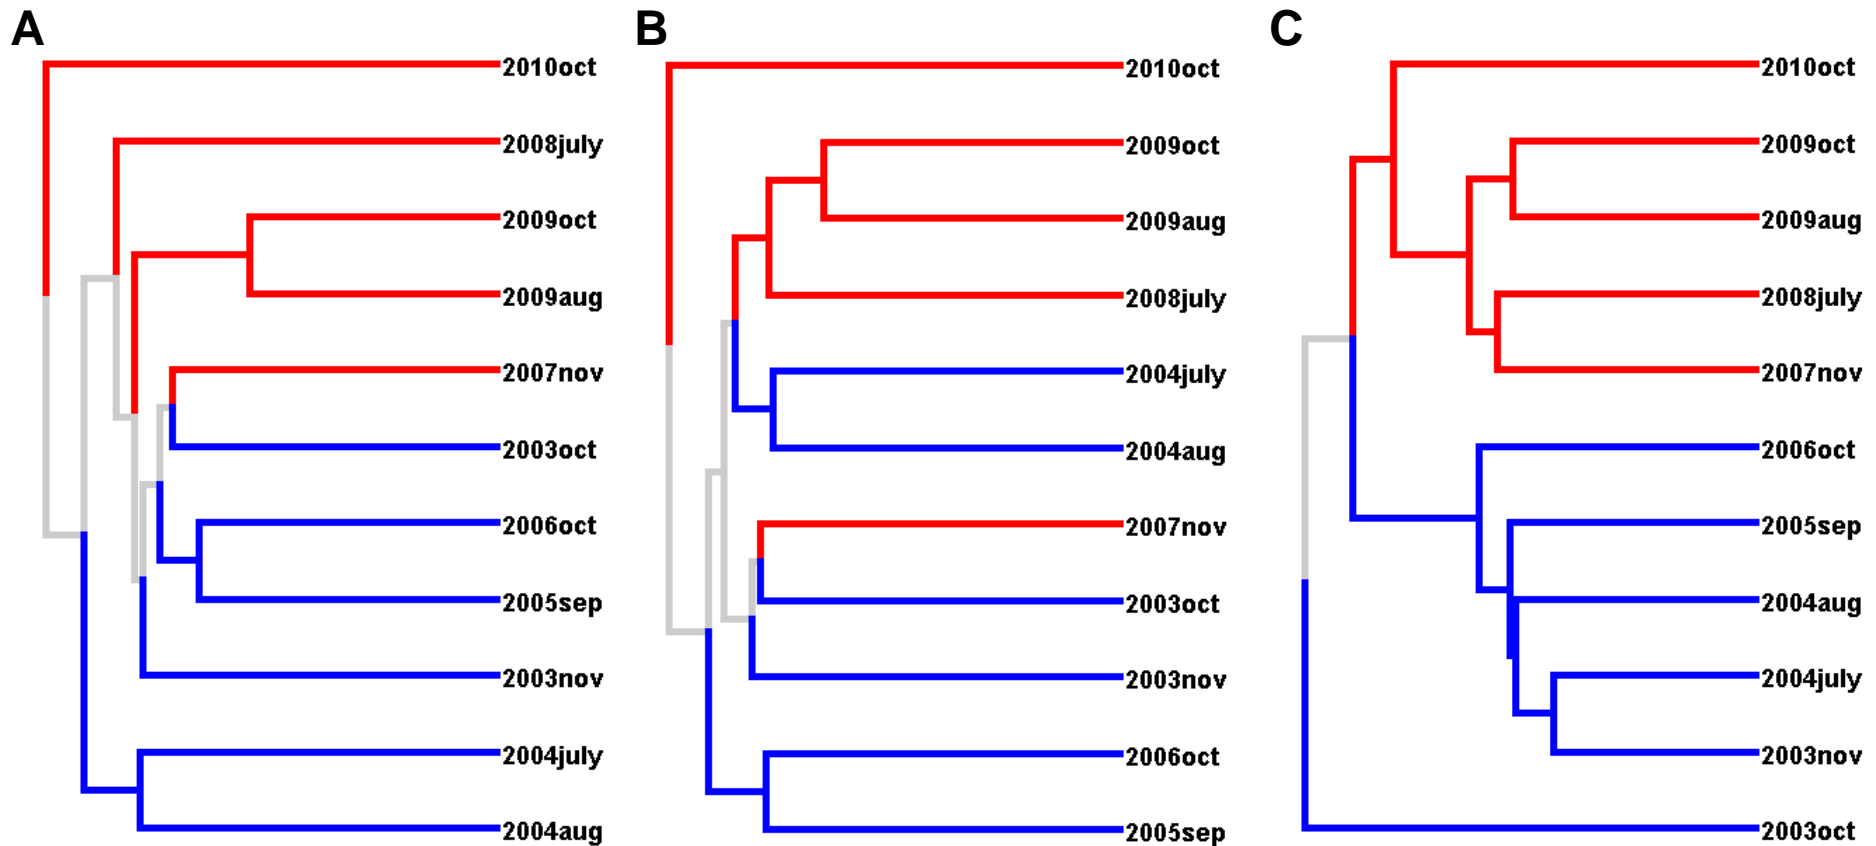

**Figure S3. Whole community diversity comparisons.** Bray-Curtis similarity trees were calculated from total OTU compositions (independent of taxonomy). Trees are colored according to Ice Extent: <2007 in blue and >2007 in red. **(A)** Bacteria 97% level OTUs. **(B)** Eukarya 98% level OTUs. **(C)** Archaea 97% level OTUs.
