# Supplementary material for: Arctic Ocean Microbial Community Structure before and after the 2007 Record Sea Ice Minimum
Source: PubMed Central journal article supplement (PMC3212577; doi:10.1371/journal.pone.0027492), 2011-11-09
Supplement: pone.0027492.s004.pdf [file pone.0027492.s004.pdf]

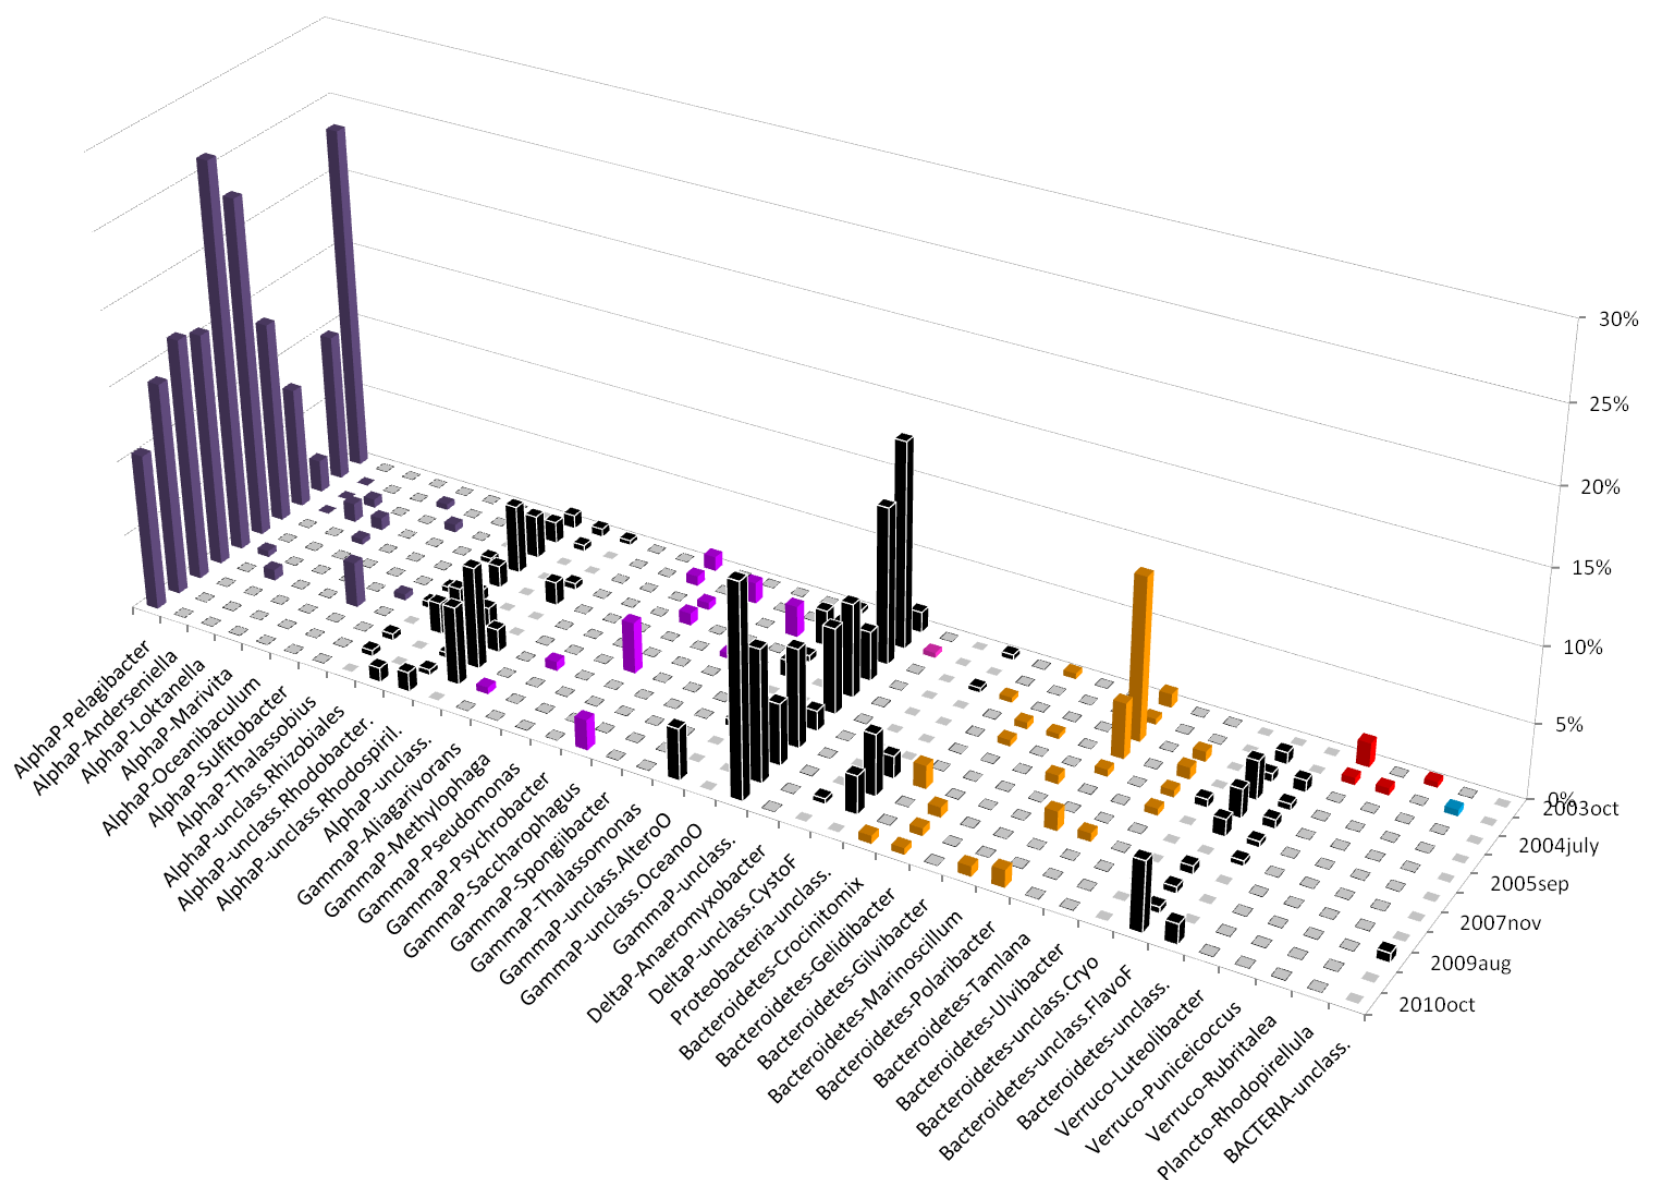

**Figure S4. Taxonomic distribution of the top 50 dominant Bacteria OTUs (97% level).** Colors are as in Figure 4:  $\alpha$ -Proteobacteria (AlphaP) are in dark purple,  $\gamma$ -Proteobacteria (GammaP) in light purple,  $\delta$ -Proteobacteria (DeltaP) in rose; Bacteroidetes in orange, Verrucomicrobia (Verruco) in red, Planctomycetes (Plancto) in blue and unclassified (unclass.) sequences are in black. Rhodobact., *Rhodobacteraceae*; Rhodospiril., *Rhodospirillaceae*; AlteroO, *Alteromonadales*; OceanoO, *Oceanospirillales*; CystoF, *Cystobacteraceae*; Cryo., *Cryomorphaceae*; FlavoF, *Flavobacteriaceae*. Gray squares indicate complete absence (0%). Note that plastid sequences are excluded.
