# Supplementary material for: Arctic Ocean Microbial Community Structure before and after the 2007 Record Sea Ice Minimum
Source: PubMed Central journal article supplement (PMC3212577; doi:10.1371/journal.pone.0027492), 2011-11-09
Supplement: pone.0027492.s005.pdf [file pone.0027492.s005.pdf]

**A**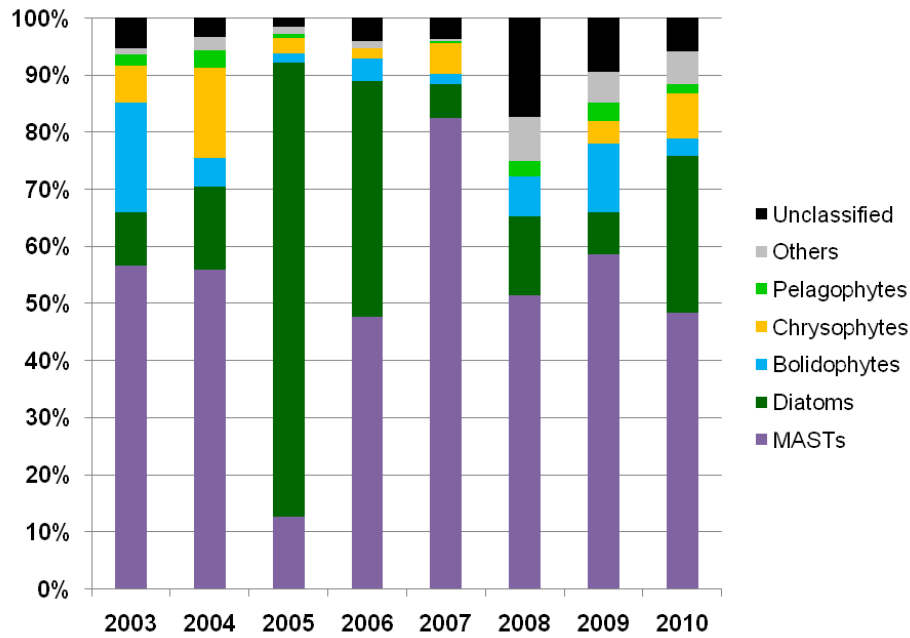**B**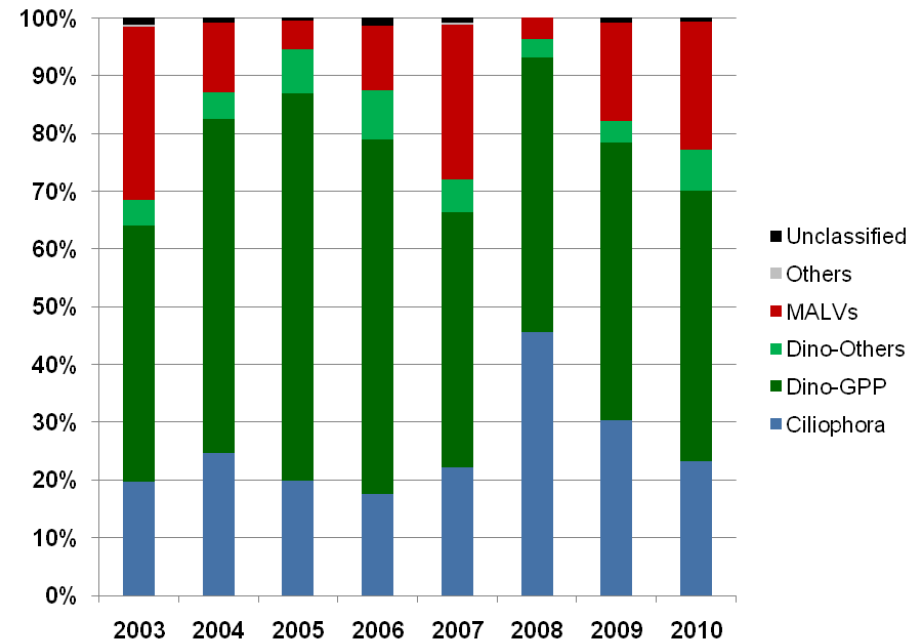

**Figure S5. Taxonomic distributions of select Eukarya group OTUs (98% level).** (A) Distribution of stramenopiles. MAST, uncultured marine stramenopile groups. (B) Distribution of Alveolates. MALV, uncultured marine Alveolate groups.
