# Supplementary material for: Arctic Ocean Microbial Community Structure before and after the 2007 Record Sea Ice Minimum
Source: PubMed Central journal article supplement (PMC3212577; doi:10.1371/journal.pone.0027492), 2011-11-09
Supplement: pone.0027492.s007.pdf [file pone.0027492.s007.pdf]

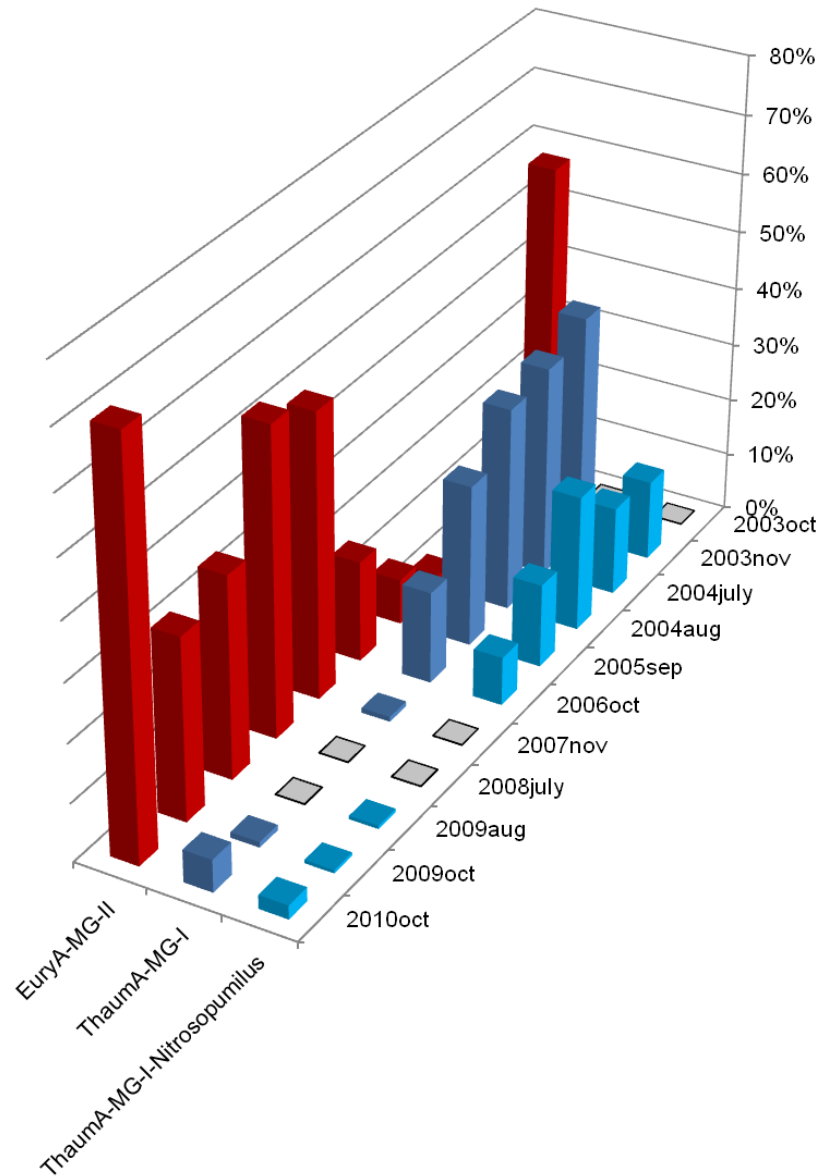

**Figure S7. Taxonomic distribution of the top 50 dominant Archaea OTUs (97% level).** Colors are as in Figure 4: *Thaumarchaeota* (ThaumA) Marine Group (MG) I are in shades of blue and *Euryarchaeota* (EuryA) MG-II in red. Gray squares indicate complete absence (0%).
