# Supplementary material for: Arctic Ocean Microbial Community Structure before and after the 2007 Record Sea Ice Minimum
Source: PubMed Central journal article supplement (PMC3212577; doi:10.1371/journal.pone.0027492), 2011-11-09
Supplement: pone.0027492.s008.pdf [file pone.0027492.s008.pdf]

**Table S1.** 16S/18S rDNA primer re-design (original primers are on gray lines, new on white).

| Name                         | 16S/18S Sequence 5'-3'            | T <sub>m</sub><br>range |              | RDP Bacteria specificity<br>(with X mismatches) |            |            | RDP Archaea specificity<br>(with X mismatches) |               |            |            |            |
|------------------------------|-----------------------------------|-------------------------|--------------|-------------------------------------------------|------------|------------|------------------------------------------------|---------------|------------|------------|------------|
|                              |                                   |                         |              | n                                               | 0          | 1          | 2                                              | n             | 0          | 1          | 2          |
| <i>B967Fmix</i> <sup>a</sup> | MNA MSC GMN RAA CCT YAN C         | 55                      | 44-65        | 652,300                                         | 90%        | 98%        | 99%                                            | 18,845        | -          | -          | 25%        |
| <b>B969F</b>                 | <b>A CGC GHN RAA CCT TAC C</b>    | <b>53</b>               | <b>49-58</b> | <b>652,300</b>                                  | <b>92%</b> | <b>98%</b> | <b>99%</b>                                     | <b>18,845</b> | -          | -          | <b>18%</b> |
| <i>BA1406R</i> <sup>b</sup>  | AC GGG CGG TGW GTR CAA            | 59                      | 57-61        | 331,093                                         | 96%        | 99%        | ~100%                                          | 6,756         | 94%        | 98%        | 98%        |
| <b>BA1406R</b>               | <b>AC GGG CRG TGW GTR CAA</b>     | <b>57</b>               | <b>53-61</b> | <b>331,093</b>                                  | <b>97%</b> | <b>99%</b> | <b>~100%</b>                                   | <b>6,756</b>  | <b>95%</b> | <b>98%</b> | <b>98%</b> |
| <i>A958F</i> <sup>a</sup>    | AAT TGG ANT CAA CGC CCG           | 55                      | 54-56        | 653,739                                         | -          | -          | -                                              | 19,230        | 69%        | 92%        | 95%        |
| <b>A956F</b>                 | <b>TY AAT YGG ANT CAA CRC C</b>   | <b>50</b>               | <b>45-55</b> | <b>653,739</b>                                  | -          | -          | -                                              | <b>19,230</b> | <b>87%</b> | <b>94%</b> | <b>97%</b> |
| <b>A1401R</b>                | <b>CRG TGW GTR CAA GGR GCA</b>    | <b>56</b>               | <b>51-62</b> | <b>327,184</b>                                  | -          | -          | -                                              | <b>8,401</b>  | <b>90%</b> | <b>96%</b> | <b>97%</b> |
| <i>Euk528F</i> <sup>b</sup>  | CC GCG GTA ATT CCA GCT CcA a      | 60                      | -            | 1,227,352                                       | -          | -          | -                                              | 53,616        | -          | -          | -          |
| <b>E572F</b>                 | <b>CY GCG GTA ATT CCA GCT C</b>   | <b>55</b>               | <b>53-56</b> | <b>1,227,352</b>                                | -          | -          | -                                              | <b>53,616</b> | -          | <b>8%</b>  | <b>25%</b> |
| <i>Brate R1</i> <sup>c</sup> | CgA AGA YGA TYA GAT ACC gT        | 51                      | 49-54        | 1,227,352                                       | -          | -          | -                                              | 53,616        | -          | -          | -          |
| <b>E1009R</b>                | <b>CRA AGA YGA TYA GAT ACC RT</b> | <b>49</b>               | <b>44-54</b> | <b>1,227,352</b>                                | -          | -          | -                                              | <b>53,616</b> | -          | -          | -          |

|                |                                  |                               |                                            |
|----------------|----------------------------------|-------------------------------|--------------------------------------------|
| <b>Legend:</b> | A – nucleotide <95% consensus    | a – nucleotide <90% consensus | A – nucleotide mismatch vs. <i>E. coli</i> |
|                | X% – 95% or more RDP specificity | X% – 80-94% RDP specificity   | X% – <80% RDP specificity                  |

Designed using ARB (<http://www.arb-home.de/>) with the SILVA 100-SSU-Ref database (<http://www.arb-silva.de/>) containing: 20,854 Eukarya (ignoring metazoans/fungi), 17,127 Archaea, and 345,332 Bacteria. T<sub>m</sub> calculated using the IDT OligoAnalyzer (<http://www.idtdna.com/analyzer/Applications/OligoAnalyzer/>). New Eukarya primers utilize the *S. cerevisiae* 18S numbering.

<sup>a</sup> The consensus of the F primer mix for 454 pyrosequencing used by VAMPS (<http://vamps.mbl.edu/resources/primers.php>).

<sup>b</sup> Standard 16/18S primers [1-3].

<sup>c</sup> 454 pyrosequencing R primer from Bråte *et al.* [4].

1. Baker G, Smith JJ, Cowan DA (2003) Review and re-analysis of domain-specific 16S primers. *J Microbiol Meth* 55: 541-555.
2. Romari K, Vaulot D (2004) Composition and temporal variability of picoeukaryote communities at a coastal site of the English Channel from 18S rDNA sequences. *Limnol Oceanogr* 49: 784-798.
3. Zhu F, Massana R, Not F, Marie D, Vaulot D (2005) Mapping of picoeukaryotes in marine ecosystems with quantitative PCR of the 18S rRNA gene. *FEMS Microbiol Ecol* 52: 79-92.
4. Bråte J *et al.* (2010) Freshwater Perkinsea and marine-freshwater colonizations revealed by pyrosequencing and phylogeny of environmental rDNA. *ISME J* 4: 1144-1153.
