# Supplementary material for: Arctic Ocean Microbial Community Structure before and after the 2007 Record Sea Ice Minimum
Source: PubMed Central journal article supplement (PMC3212577; doi:10.1371/journal.pone.0027492), 2011-11-09
Supplement: pone.0027492.s009.pdf [file pone.0027492.s009.pdf]

**Table S2.** 16/18S pyrosequencing primers.

| <b>Primer Name<sup>a</sup></b> | <b>Sequence 5'-3'</b>                                        |
|--------------------------------|--------------------------------------------------------------|
| <b><i>Bacteria 16S</i></b>     |                                                              |
| A1-B969F                       | CCATCTCATCCCTGCGTGTCTCCGACTCAG•ACGAGTGCGT•ACGCGHNRAACCTTACC  |
| A2-B969F                       | CCATCTCATCCCTGCGTGTCTCCGACTCAG•ACGCTCGACA•ACGCGHNRAACCTTACC  |
| A3-B969F                       | CCATCTCATCCCTGCGTGTCTCCGACTCAG•AGACGCACTC•ACGCGHNRAACCTTACC  |
| A4-B969F                       | CCATCTCATCCCTGCGTGTCTCCGACTCAG•AGCACTGTAG•ACGCGHNRAACCTTACC  |
| A5-B969F                       | CCATCTCATCCCTGCGTGTCTCCGACTCAG•ATCAGACACG•ACGCGHNRAACCTTACC  |
| A6-B969F                       | CCATCTCATCCCTGCGTGTCTCCGACTCAG•ATATCGCGAG•ACGCGHNRAACCTTACC  |
| A7-B969F                       | CCATCTCATCCCTGCGTGTCTCCGACTCAG•CGTGTCTCTA•ACGCGHNRAACCTTACC  |
| A8-B969F                       | CCATCTCATCCCTGCGTGTCTCCGACTCAG•CTCGCGTGTC•ACGCGHNRAACCTTACC  |
| A9-B969F                       | CCATCTCATCCCTGCGTGTCTCCGACTCAG•TAGTATCAGC•ACGCGHNRAACCTTACC  |
| A10-B969F                      | CCATCTCATCCCTGCGTGTCTCCGACTCAG•TCTCTATGCG•ACGCGHNRAACCTTACC  |
| A12-B969F                      | CCATCTCATCCCTGCGTGTCTCCGACTCAG•TACTGAGCTA•ACGCGHNRAACCTTACC  |
| B-BA1406R                      | CCTATCCCCTGTGTGCCTTGGCAGTCTCAG•ACGGGCRGTGWGTRCAA             |
| <b><i>Archaea 16S</i></b>      |                                                              |
| A1-A956F                       | CCATCTCATCCCTGCGTGTCTCCGACTCAG•ACGAGTGCGT•TYAATYGGANTCAACRCC |
| A2-A956F                       | CCATCTCATCCCTGCGTGTCTCCGACTCAG•ACGCTCGACA•TYAATYGGANTCAACRCC |
| A3-A956F                       | CCATCTCATCCCTGCGTGTCTCCGACTCAG•AGACGCACTC•TYAATYGGANTCAACRCC |
| A4-A956F                       | CCATCTCATCCCTGCGTGTCTCCGACTCAG•AGCACTGTAG•TYAATYGGANTCAACRCC |
| A5-A956F                       | CCATCTCATCCCTGCGTGTCTCCGACTCAG•ATCAGACACG•TYAATYGGANTCAACRCC |
| A6-A956F                       | CCATCTCATCCCTGCGTGTCTCCGACTCAG•ATATCGCGAG•TYAATYGGANTCAACRCC |
| A7-A956F                       | CCATCTCATCCCTGCGTGTCTCCGACTCAG•CGTGTCTCTA•TYAATYGGANTCAACRCC |
| A8-A956F                       | CCATCTCATCCCTGCGTGTCTCCGACTCAG•CTCGCGTGTC•TYAATYGGANTCAACRCC |
| A9-A956F                       | CCATCTCATCCCTGCGTGTCTCCGACTCAG•TAGTATCAGC•TYAATYGGANTCAACRCC |
| A10-A956F                      | CCATCTCATCCCTGCGTGTCTCCGACTCAG•TCTCTATGCG•TYAATYGGANTCAACRCC |
| A12-A956F                      | CCATCTCATCCCTGCGTGTCTCCGACTCAG•TACTGAGCTA•TYAATYGGANTCAACRCC |
| B-A1401R                       | CCTATCCCCTGTGTGCCTTGGCAGTCTCAG•CRGTGWGTRCAAGGRGCA            |

**Table S2 continued...**

| <b>Primer Name<sup>a</sup></b> | <b>Sequence 5'-3'</b>                                        |
|--------------------------------|--------------------------------------------------------------|
| <b><i>Eukarya 18S</i></b>      |                                                              |
| A1-E572F                       | CCATCTCATCCCTGCGTGTCTCCGACTCAG•ACGAGTGCGT•CYGCGGTAATTCCAGCTC |
| A2-E572F                       | CCATCTCATCCCTGCGTGTCTCCGACTCAG•ACGCTCGACA•CYGCGGTAATTCCAGCTC |
| A3-E572F                       | CCATCTCATCCCTGCGTGTCTCCGACTCAG•AGACGCACTC•CYGCGGTAATTCCAGCTC |
| A4-E572F                       | CCATCTCATCCCTGCGTGTCTCCGACTCAG•AGCACTGTAG•CYGCGGTAATTCCAGCTC |
| A5-E572F                       | CCATCTCATCCCTGCGTGTCTCCGACTCAG•ATCAGACACG•CYGCGGTAATTCCAGCTC |
| A6-E572F                       | CCATCTCATCCCTGCGTGTCTCCGACTCAG•ATATCGCGAG•CYGCGGTAATTCCAGCTC |
| A7-E572F                       | CCATCTCATCCCTGCGTGTCTCCGACTCAG•CGTGTCTCTA•CYGCGGTAATTCCAGCTC |
| A8-E572F                       | CCATCTCATCCCTGCGTGTCTCCGACTCAG•CTCGCGTGTC•CYGCGGTAATTCCAGCTC |
| A9-E572F                       | CCATCTCATCCCTGCGTGTCTCCGACTCAG•TAGTATCAGC•CYGCGGTAATTCCAGCTC |
| A10-E572F                      | CCATCTCATCCCTGCGTGTCTCCGACTCAG•TCTCTATGCG•CYGCGGTAATTCCAGCTC |
| A12-E572F                      | CCATCTCATCCCTGCGTGTCTCCGACTCAG•TACTGAGCTA•CYGCGGTAATTCCAGCTC |
| B-E1009R                       | CCTATCCCCTGTGTGCCTTGGCAGTCTCAG•AYGGTATCTRATCRTCTTYG          |

<sup>a</sup> Bar-code #11 was skipped and the 11<sup>th</sup> sample used Roche MID #12 (i.e.: A12-B969F).

Primers are constituted of 30 bp Roche 454 adaptors (A for forward, B for reverse), 10 bp Roche MID bar-codes (shown between dots for clarity; absent from reverse primers), and the 17-20 bp rDNA-specific sequences detailed in **Table S1**.
