# Supplementary material for: Arctic Ocean Microbial Community Structure before and after the 2007 Record Sea Ice Minimum
Source: PubMed Central journal article supplement (PMC3212577; doi:10.1371/journal.pone.0027492), 2011-11-09
Supplement: pone.0027492.s011.pdf [file pone.0027492.s011.pdf]

**Table S4.** Pyrotag raw data, filtering and OTU statistics.

|                                                 | <b>Bacteria</b> | <b>Eukarya</b> | <b>Archaea</b> |
|-------------------------------------------------|-----------------|----------------|----------------|
| <b>Raw Data<sup>a</sup></b>                     |                 |                |                |
| reads                                           | 74,566          | 173,549        | 93,040         |
| total sequence                                  | 22.0 Mb         | 63.7 Mb        | 33.7 Mb        |
| mean length                                     | 296 bp          | 367 bp         | 362 bp         |
| <b>Quality Filters<sup>b</sup></b>              |                 |                |                |
| reads with Ns                                   | 2,352 (3%)      | 4,829 (3%)     | 6,210 (7%)     |
| reads <150 bp                                   | 21,791 (29%)    | 17,632 (10%)   | 5,762 (6%)     |
| reads longer than expected                      | 9 (<0.1%)       | 0              | 0              |
| reads with bad Forward primer                   | 6,127 (8%)      | 5,674 (3%)     | 6,293 (7%)     |
| total                                           | 30,279 (41%)    | 28,135 (16%)   | 18,265 (20%)   |
| <b>Post-Filtering</b>                           |                 |                |                |
| final reads                                     | 44,287 (69%)    | 145,404 (84%)  | 74,775 (80%)   |
| mean length                                     | 386 bp          | 402 bp         | 382 bp         |
| median length                                   | 430 bp          | 434 bp         | 426 bp         |
| <b>OTU Analysis<sup>c</sup></b>                 |                 |                |                |
| OTUs (all samples) – non-redundant <sup>d</sup> | 2,739           | 11,961         | 1,122          |
| OTUs (all samples) – cumulative <sup>e</sup>    | 9,298           | 30,405         | 4,064          |
| mean OTUs (per sample)                          | 845             | 2,764          | 369            |
| range OTUs (per sample)                         | 690-937         | 1,876-3,094    | 205-503        |

<sup>a</sup> Raw data for Bacteria was generated at the McGill University/G enome Qu ebec Innovation Centre and for Eukarya/Archaea at the IBIS/Universit  Laval Plate-forme d'Analyses G enomiques.

<sup>b</sup> Filters were added sequentially, in the presented order; therefore some reads may have fallen into multiple categories.

<sup>c</sup> OTUs were clustered at  $\geq 97\%$  similarity for Bacteria/Archaea and  $\geq 98\%$  for Eukarya. The number of input reads for each bar-code was also re-sampled to have even numbers in all bar-codes (i.e.: equal to the lowest number present in any one bar-code): 2474/sample for Bacteria, 8700/sample for Eukarya and 1118/sample for Archaea.

<sup>d</sup> Non-redundant totals when all reads are clustered together.

<sup>e</sup> Cumulative totals when OTUs are split for each of the 11 bar-codes.
