# Supplementary material for: Arctic Ocean Microbial Community Structure before and after the 2007 Record Sea Ice Minimum
Source: PubMed Central journal article supplement (PMC3212577; doi:10.1371/journal.pone.0027492), 2011-11-09
Supplement: pone.0027492.s012.pdf [file pone.0027492.s012.pdf]

**Table S5.** Assignments of the samples to the various categories used to test for significant trends (see Fig. 1 and Table 1).

| Sample# | Date      | Analysis Factor |              |      |        |                  |                                        |
|---------|-----------|-----------------|--------------|------|--------|------------------|----------------------------------------|
|         |           | Ice Extent      | Geography    | Year | Season | PAR <sup>a</sup> | Chl <i>a</i> Distribution <sup>b</sup> |
| 1       | Oct.2003  | <2007           | Open Ocean   | 2003 | Fall   | Low              | Shared                                 |
| 2       | Nov.2003  | <2007           | Franklin Bay | 2003 | Fall   | Low              | Shared                                 |
| 3       | July 2004 | <2007           | Franklin Bay | 2004 | Summer | Med              | Shared                                 |
| 4       | Aug.2004  | <2007           | Franklin Bay | 2004 | Summer | High             | Nano                                   |
| 5       | Sep.2005  | <2007           | Open Ocean   | 2005 | Summer | High             | Nano                                   |
| 6       | Oct.2006  | <2007           | Open Ocean   | 2006 | Fall   | Med              | Nano                                   |
| 7       | Nov.2007  | >2007           | Open Ocean   | 2007 | Fall   | Low              | Nano                                   |
| 8       | July 2008 | >2007           | Open Ocean   | 2008 | Summer | Med              | Pico                                   |
| 9       | Aug.2009  | >2007           | Open Ocean   | 2009 | Summer | High             | Pico                                   |
| 10      | Oct.2009  | >2007           | Open Ocean   | 2009 | Fall   | Low              | Pico                                   |
| 11      | Oct.2010  | >2007           | Open Ocean   | 2010 | Fall   | Low              | Nano                                   |

<sup>a</sup> Low-light was considered as  $<0.1 \mu\text{E m}^{-2} \text{s}^{-1}$ , medium-light as  $0.1\text{-}1.0 \mu\text{E m}^{-2} \text{s}^{-1}$  and high-light as  $>1.0 \mu\text{E m}^{-2} \text{s}^{-1}$  PAR (Photosynthetically-Active Radiation) as measured at the depth sampled (see Fig.1).

<sup>b</sup> The percent distribution of Chlorophyll *a* in the small ( $<3 \mu\text{m}$ ) vs. large ( $>3 \mu\text{m}$ ) fractions was taken as a proxy for successional stage. Communities were binned as  $>60\%$  (Nano-dominated),  $40\text{-}60\%$  (shared), or  $<40\%$  (Pico-dominated) in the large fraction as measured at the depth sampled (see Fig.1).
